# Replication-Dependent and Transcription-Dependent Mechanisms of DNA Double-Strand Break Induction by the Topoisomerase 2-Targeting Drug Etoposide

Margaret Tammaro, Peri Barr, Brett Ricci, Hong Yan\*

Fox Chase Cancer Center, Philadelphia, Pennsylvania, United States of America

## Abstract

Etoposide is a DNA topoisomerase 2-targeting drug widely used for the treatment of cancer. The cytotoxicity of etoposide correlates with the generation of DNA double-strand breaks (DSBs), but the mechanism of how it induces DSBs in cells is still poorly understood. Catalytically, etoposide inhibits the re-ligation reaction of Top2 after it nicks the two strands of DNA, trapping it in a cleavable complex consisting of two Top2 subunits covalently linked to the 5' ends of DNA (Top2cc). Top2cc is not directly recognized as a true DSB by cells because the two subunits interact strongly with each other to hold the two ends of DNA together. In this study we have investigated the cellular mechanisms that convert Top2ccs into true DSBs. Our data suggest that there are two mechanisms, one dependent on active replication and the other dependent on proteolysis and transcription. The relative contribution of each mechanism is affected by the concentration of etoposide. We also find that Top2 $\alpha$  is the major isoform mediating the replication-dependent mechanism and both Top2 $\alpha$  and Top2 mediate the transcription-dependent mechanism. These findings are potentially of great significance to the improvement of etoposide's efficacy in cancer therapy.

**Citation:** Tammaro M, Barr P, Ricci B, Yan H (2013) Replication-Dependent and Transcription-Dependent Mechanisms of DNA Double-Strand Break Induction by the Topoisomerase 2-Targeting Drug Etoposide. PLoS ONE 8(11): e79202. doi:10.1371/journal.pone.0079202

**Editor:** Anja-Katrin Bielinsky, University of Minnesota, United States of America

**Received:** April 25, 2013; **Accepted:** September 19, 2013; **Published:** November 7, 2013

**Copyright:** © 2013 Tammaro et al. This is an open-access article distributed under the terms of the Creative Commons Attribution License, which permits unrestricted use, distribution, and reproduction in any medium, provided the original author and source are credited.

**Funding:** This study was supported by grants from the National Institute of Health (<http://nih.gov/>) to H.Y. (R01 GM57962-02 and 2 R01 GM057962-12A1). The funders had no role in study design, data collection and analysis, decision to publish, or preparation of the manuscript.

**Competing interests:** The authors have declared that no competing interests exist.

\* E-mail: [Hong\\_Yan@fcc.edu](mailto:Hong_Yan@fcc.edu)

## Introduction

Etoposide (VP16) is one of the most widely used drugs for the treatment of various types of human malignancy, including leukemia, lymphoma, and solid tumors [1–4]. However, its efficacy varies significantly among different types of cancer. In addition, it is associated with the serious side effect of secondary leukemia resulting from drug induced chromosome translocations [5,6]. The cytotoxicity and the side effects of etoposide are both correlated with the induction of DNA double-strand breaks in cells [7,8]. Better understanding of how etoposide induces DSBs and their repair is of great significance to the maximization of the therapeutic efficacy as well as the minimization of the side effects of this important drug.

The primary cellular target of etoposide is DNA topoisomerase 2 (Top2), a homodimeric enzyme that changes the topology of DNA [2,3]. Mammalian cells contain two Top2 isoforms, Top2 $\alpha$  and Top2 $\beta$ , which share ca. 70% sequence identity [9–12]. Top2 $\alpha$  is highly expressed in dividing cells and tumor cells, and further up-regulated during S and G2 phases [13–15]. It is essential for cell proliferation, participating in replication, transcription, and chromosome structure and

segregation [16]. Top2 $\beta$  is expressed in dividing as well as non-dividing cells [17]. It is dispensable for cell proliferation, but required for development (Top2 $\beta$  knockout mice die from neural defect at birth) and appears to participate in transcription [18–20]. Catalytically, the two isoforms use the same mechanism and are inhibited indiscriminately by etoposide and thus often collectively referred to as Top2 [21,22]. During the catalytic cycle, each subunit of Top2 nicks one strand of DNA to generate a double-strand break, through which another DNA then passes, resulting in changes of topology [23]. The 5' end of each nick is covalently linked to a tyrosine residue at the catalytic center of each subunit, forming a Top2-DNA cleavable complex (Top2cc). The 3' ends are juxtaposed to the 5' ends, allowing the nicks to be religated after the passage of the target strand to complete the catalytic cycle. Upon binding of etoposide, Top2 is trapped at the Top2cc intermediate step [23,24]. However, the two sides of the DSB are still held together by the strong interaction between the two subunits of Top2 and will be immediately resealed once etoposide has dissociated [25]. For Top2cc to be recognized as a true DSB, it has to be further processed by cells [2]. Despite its importance,

the mechanism by which cells convert a Top2cc into a true DSB is still not well understood.

Top2cc is expected to be directly sensed as a roadblock to the progression of replication and transcription machineries. It has been observed that transcription stimulates the degradation of etoposide-trapped Top2ccs. Trapped Top2 is ubiquitinated and then degraded by the 26S proteasome [26]. The ubiquitination step is independent of transcription, but the degradation step is strongly stimulated by transcription [27]. In principle, the degradation of Top2cc should convert a Top2cc into a true DSB. In support of this hypothesis, inhibitors of either transcription or the 26S proteasome cause significant reductions in the number of etoposide-induced DSBs based on neutral COMET assays [28]. Both isoforms of Top2 are degraded after etoposide treatment, but Top2 $\beta$  is degraded much more rapidly and extensively than Top2 $\alpha$  [29]. In line with this difference, Top2 $\beta$  has been suggested to be the dominant isoform mediating the transcription-dependent DSB induction by etoposide [30,31]. However, it has also been shown by many (though not all) studies that Top2 $\alpha$  rather than Top2 $\beta$  is the dominant isoform mediating cytotoxicity of etoposide in human cells [30,32] and in mice [33]. This apparent paradox suggests that the transcription-dependent mechanism might not be the only one for DSB induction by etoposide. The most logical alternative mechanism is through replication, which in principle should also collide with Top2cc and might result in DSB formation. This has been implied by observations that inhibiting replication can partially rescue the cytotoxicity of etoposide [34,35]. However, there has been no direct evidence for this mechanism of DSB induction by etoposide or other Top2-targeting drugs.

In this study we have investigated the cellular mechanisms by which etoposide induces DSBs in cells. Our data revealed that there are two mechanisms, one mechanism dependent on DNA replication and the other on transcription. The transcription-dependent mechanism requires proteolysis, but the replication-dependent mechanism does not. The relative contribution of each mechanism is affected by the concentration of etoposide. At low concentrations of etoposide, the replication-dependent mechanism dominates, whereas at high concentrations of etoposide, both mechanisms are active. We also found that Top2 $\alpha$  and Top2 $\beta$  can both mediate DSB induction. Top2 $\alpha$  is the major isoform responsible for the replication-dependent mechanism, and Top2 $\alpha$  and Top2 $\beta$  are both capable of mediating the transcription-dependent mechanism. These findings are of great significance to the understanding of the generation and repair mechanisms of etoposide-induced DSBs and the improvement of etoposide efficacy in cancer therapy.

## Materials and Methods

### Cell culture and reagents

The human osteosarcoma (U2OS) cells, Dulbecco's Modified Eagle Medium (DMEM), fetal bovine serum, penicillin/streptomycin (P/S), L-glutamine, and non-essential amino acids (NEAA) were obtained from the Tissue Culture facility at Fox Chase Cancer Center. Cells were grown in DMEM

supplemented with 10% FBS, 2 mM L-glutamine, NEAA, and P/S at 37°C under a 5% CO<sub>2</sub> humidified atmosphere. Etoposide, aphidicolin (Aph), 5,6-dichloro-1-D-ribofuransylbenzimidazole (DRB), MG132, and n-propyl gallate were purchased from Sigma-Aldrich (MO). Glycerol, PIPES, EGTA, and formaldehyde were purchased from Fisher Scientific (PA). Mouse anti-RPA2 antibody was from Calbiochem (CA). Rabbit antibodies against CenpF, Top2 $\alpha$ , and Top2 $\beta$  were kindly provided by Dr. Timothy Yen. Click-iT EdU Alexa Fluor 647 imaging kit with Hoechst, goat anti-mouse Alexa Fluor 488, and goat anti-rabbit Alexa Fluor 568 were purchased from Invitrogen (CA). Top2 $\alpha$  siRNA (S102665068) and Top2 $\beta$  siRNA (S102780736) were purchased from Qiagen (MD). Control non-targeting siRNA (D-0012101-03) was purchased from Dharmacon (CA).

### Indirect immunofluorescence staining

U2OS cells were seeded in 24-well plates containing coverslips at a density of 8,000 cells per well. After two days of growth, cells were treated with etoposide and various inhibitors. Etoposide was added at the indicated concentrations to the media and then incubated for 2 hours. For pre-treatment with other inhibitors, Aph (30 $\mu$ M), DRB (300 $\mu$ M), and MG132 (20 $\mu$ M) were added 30 minutes prior to etoposide addition and were present throughout the subsequent etoposide treatment. To follow DNA synthesis, EdU was added 15 minutes prior to etoposide. For immunostaining, cells were pre-extracted with 0.1M PIPES(pH6.9)/1mM EGTA/4M glycerol/0.2% Triton X-100 for 1 minute, washed with 0.1M PIPES(pH6.9)/1mM EGTA/4M glycerol for 2 minutes, and fixed with 3.7% formaldehyde/50mM PIPES (pH6.9)/1mM MgCl<sub>2</sub>/5mM EGTA for 20 minutes. Cells were then incubated with primary antibodies against mouse anti-RPA2 and rabbit anti-CenpF followed by secondary antibodies goat anti-mouse Alexa Fluor 488 and goat anti-rabbit Alexa Fluor 568. For detection of EdU incorporation, cells were first stained with azide Alexa Fluor 647 following the manufacturer's procedure before antibody staining. DNA was counterstained with Hoechst-containing mounting solution (1x PBS/4% n-propyl gallate/90% glycerol). Images were collected with a monochrome DAGE-MTI cooled CCD-300-RT camera under the control of Scion Image 1.6.1 (Scion Corp, MD) and processed for proper contrast/level and pseudo-colors in Photoshop CS 4.0 (Adobe Systems, CA).

### Data analysis

At least 200 nuclei were counted and at least three sets of data were collected for each condition. The averages and standard deviations of the percentages of RPA focus positive nuclei were calculated and plotted. For comparisons of means, a two-tailed T-test was conducted at 95% confidence level (c.i.) unless otherwise indicated.

### Top2 depletion with siRNAs

U2OS cells were seeded in 24 well plates containing coverslips at a density of 6,000 cells per well. After 24 hours of incubation, cells were transfected with 20nM of the following siRNAs: Top2 $\alpha$ , Top2 $\beta$ , Top2 $\alpha$  + Top2 $\beta$ , or control. This was repeated after 24 hours and, after another 48 hours, cells were

treated with etoposide for 2 hours and stained as described above.

## Results

### Low concentration etoposide induces RPA foci only in S phase cells

Cells treated with etoposide developed a large number of discrete subnuclear foci of replication protein A (RPA), the eukaryotic single-stranded DNA binding protein (Figure 1A). Compared to the weaker granular RPA staining in untreated cells, the etoposide-induced RPA foci are bright and discrete. Similar RPA foci have also been previously observed [36], and recent studies suggest that they represent the RPA molecules bound to 3' ss-DNA resected from DSBs [37]. Resection is under cell cycle control and occurs during S and G2 phases when CDK2 activates the key resection protein CtIP via phosphorylation [38]. Consistent with this interpretation, etoposide-induced RPA foci were detected only in a subset of cells. To further demonstrate if these RPA foci positive cells are in S and G2 phases, we analyzed the relationship between RPA focus induction and cell cycle stage. Two markers were used to determine cell cycle stage: EdU, a nucleotide analog incorporated into DNA in S phase cells, and CenpF, a kinetochore protein that accumulates in S phase and peaks in G2 [39]. EdU was added 15 minutes before the addition of 10 $\mu$ M etoposide. After 2 hours of treatment with etoposide, cells were fixed and triple-stained for RPA, EdU, and CenpF. As shown in Figure 1B, RPA foci were detected mainly in EdU<sup>+</sup> nuclei (S phase), rarely in CenpF<sup>+</sup> but EdU<sup>-</sup> nuclei (G2), and completely absent in CenpF<sup>-</sup> and EdU<sup>-</sup> nuclei (G1) nuclei. Some nuclei showed limited DNA synthesis and their RPA foci were usually associated with regions of EdU staining (Figure 1C). A quantitative analysis of RPA foci positive nuclei against cell cycle stage showed that while over 96% of S phase nuclei showed a large number of RPA foci, only 11% of G2 nuclei and 0% of G1 nuclei showed RPA foci (Figure 1D). (The few RPA foci negative S phase cells were small in size and showed only weak EdU staining, suggesting that they were in early S phase and have no need for Top2 yet (data not shown)). Together, these observations suggest that 10 $\mu$ M etoposide induces RPA foci mainly in S phase. Since both S phase and G2 phase cells are able to resect DSBs, this result also indicates that 10 $\mu$ M etoposide can efficiently induce DSBs in S phase but not in G2 phase cells.

### RPA induction by low concentration etoposide is predominantly stimulated by replication rather than transcription

The above observation suggests that DSB induction by etoposide might be coupled to DNA replication. Conceivably, a replication fork might collide with a Top2cc, converting into a DSB. If so, blocking DNA synthesis should prevent RPA focus formation. We tested this hypothesis with aphidicolin, a specific inhibitor of replicative DNA polymerases and [40]. Briefly, aphidicolin was added 15 minutes before EdU (and 30 minutes before etoposide) to the media. After the addition of 10 $\mu$ M etoposide, cells were incubated for a further two hours before

being fixed and stained for RPA, CenpF, and EdU. Under this condition, EdU incorporation into DNA was no longer detectable, and RPA focus formation was strongly inhibited (Figure 2A). The number of nuclei with large numbers of discrete RPA foci was dramatically reduced from ca. 52% down to 6% ( $p=0$ ), which is not statistically different from the 4% caused by aphidicolin alone ( $p=0.38$ ) (Figure 2D). This suggests that DSB induction by low concentration etoposide is the result of replication fork collision with Top2ccs.

This finding is somewhat unexpected as it has been shown previously that transcription rather than replication is the dominant process mediating the induction of DSBs by etoposide [28]. We thus examined how inhibiting transcription might impact RPA focus formation. Instead of aphidicolin, we pre-treated cells with 5,6-dichloro-1-D-ribofuransylbenzimidazole (DRB), an inhibitor of RNA polymerase II-dependent transcription that has been shown to block Top2 degradation and DSB formation induced by etoposide [28,41]. As shown in Figure 2B, RPA foci still formed efficiently in the presence of DRB, albeit with a slight reduction in staining intensity. The percentage of nuclei with RPA foci was ca. 50% after DRB treatment, not significantly different from ca. 52% without DRB ( $p=0.38$ ) (Figure 2D). Together, these observations suggest that with 10 $\mu$ M etoposide, replication rather than transcription is the dominant process mediating the formation of DSB formation in cells.

### High concentration etoposide induces RPA foci in both S and G2 cells and by both replication-dependent and transcription-dependent mechanisms

Previous studies have suggested that etoposide induces DSBs by a transcription-dependent mechanism [28,30]. However, our data showed that this is not the case for 10 $\mu$ M etoposide. In the study that showed transcription as the dominant process mediating DSB formation, the concentration of etoposide used was 250 $\mu$ M, much higher than the 10 $\mu$ M used in our experiment described above [28,30]. To determine if this might account for the difference in the two studies, we examined the induction of RPA foci at 250 $\mu$ M etoposide. As shown in Figure 3A&B, there was a massive induction of RPA foci at this concentration of etoposide. Co-staining with EdU and CenpF showed that not only S phase cells (EdU<sup>+</sup>) but also G2 phase cells (EdU<sup>-</sup>/CenpF<sup>+</sup>) formed discrete RPA foci. Even a small fraction of G1 cells (EdU<sup>-</sup>/CenpF<sup>-</sup>) showed some RPA foci, but the number of foci was low (

< 20) (presumably resulting from basal level resection in G1 cells). Quantitative analysis revealed that all S and G2 cells were positive for RPA foci (Figure 3C). This suggests that DSBs were formed in both S phase and G2 phase cells at high concentrations of etoposide.

To determine how replication and transcription might impact RPA focus induction by high concentration etoposide, we then analyzed the effect of aphidicolin and DRB. As shown in Figure 4A, in contrast to the effect on low concentration etoposide, aphidicolin did not significantly inhibit RPA focus induction by high concentration etoposide. RPA foci were still efficiently formed, and the percentage of positive cells was not altered (Figure 4D). DRB did have some effect. RPA foci were slightly

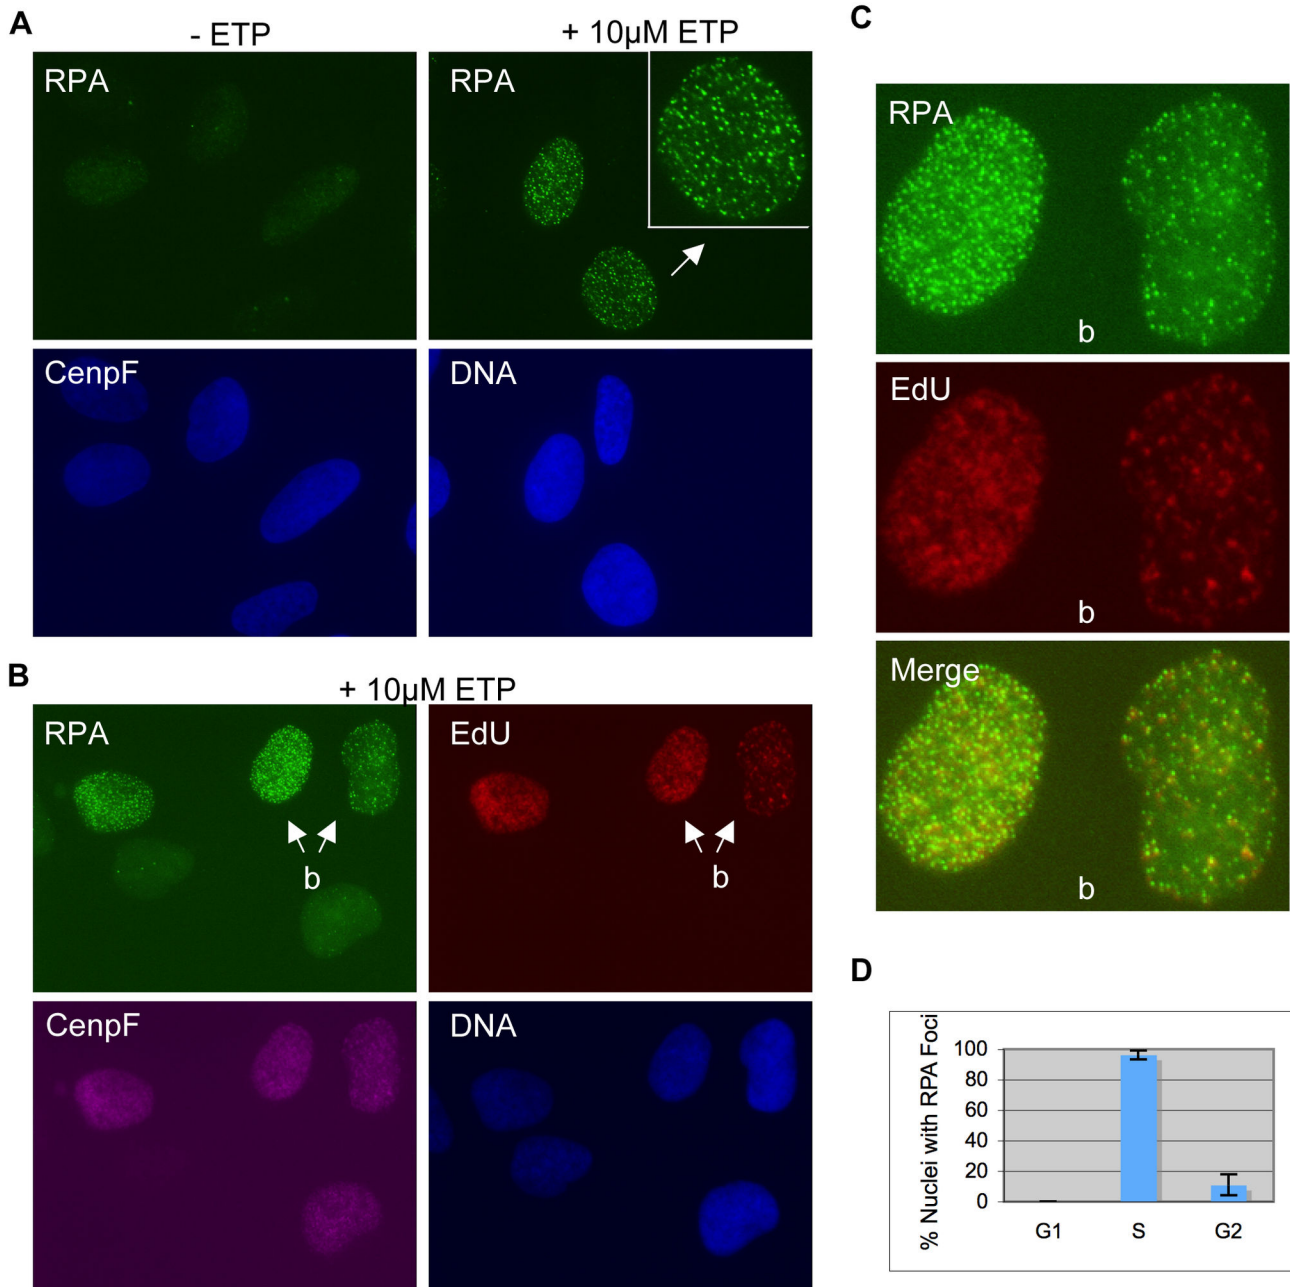

**Figure 1. Etoposide at low concentrations induces RPA foci in S phase cells only.** (A) U2OS cells were treated with or without 10µM etoposide for 2 hours and then fixed for staining with antibodies against RPA. DNA was stained with Hoechst. (B) U2OS cells were pre-incubated with EdU for 15 minutes before the addition of 10µM etoposide. After two further hours of incubation, cells were fixed and stained for RPA, EdU, and CenpF. DNA was stained with Hoechst. RPA foci were slightly reduced in intensity by the EdU staining protocol but remained discrete and clearly visible. Arrows indicate the two nuclei to be shown in enlarged format in (C). (C) Enlarged pictures of the nuclei indicated by the arrows in (B). (D) Percentages of RPA foci positive cells in each cell cycle stage were quantified and plotted.

doi: 10.1371/journal.pone.0079202.g001

fainter and the percentage of foci positive nuclei was reduced from 72% to 57% ( $p=1.48E-4$ ) (Figure 4D). When both aphidicolin and DRB were used, the result was a dramatic

reduction in RPA focus induction (Figure 4C). The percentage of nuclei with significant RPA foci decreased from 72% down to 12% ( $p=0$ ) (Figure 4D). These observations suggest that at

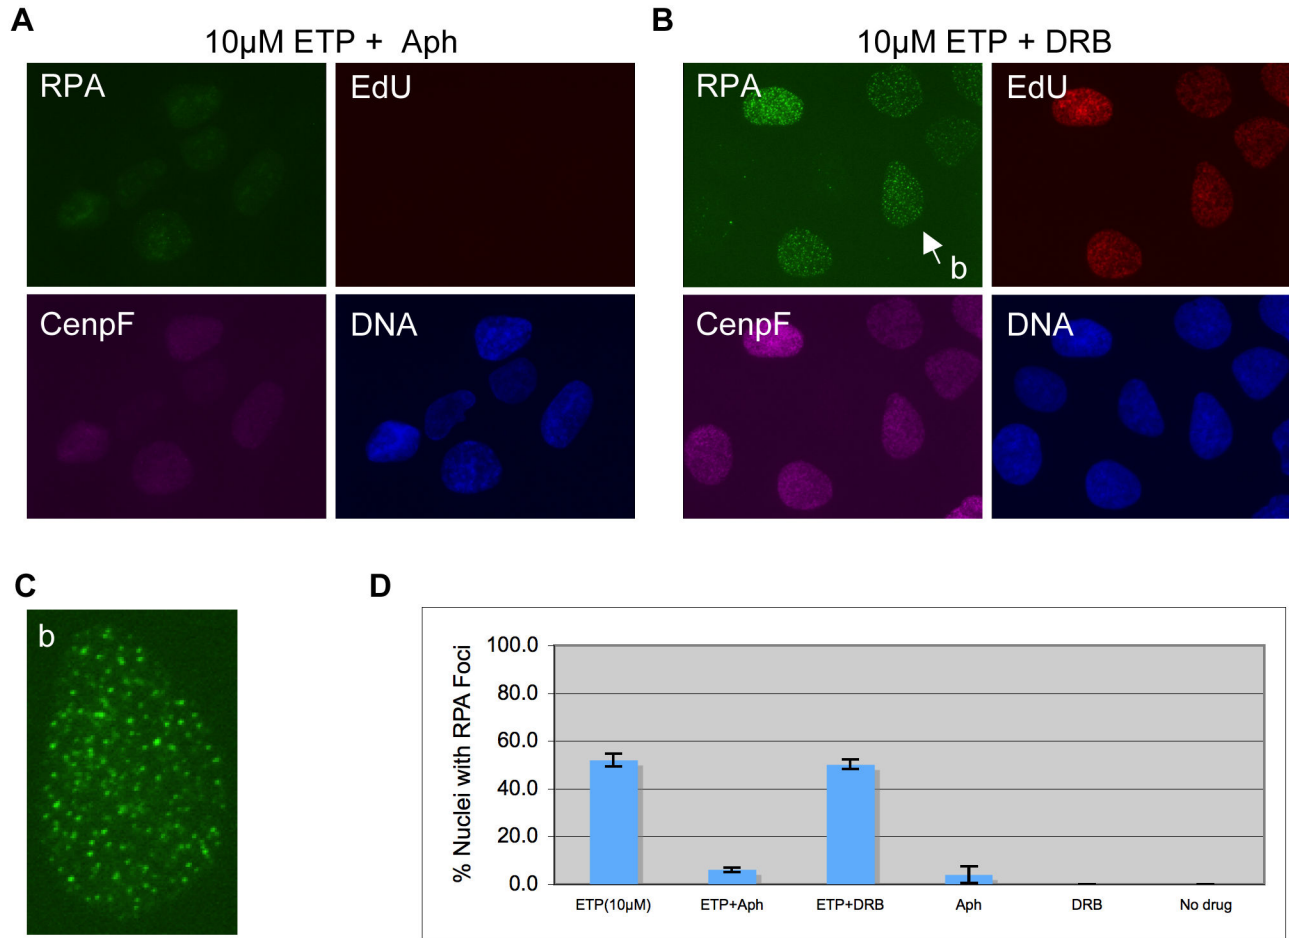

**Figure 2. RPA focus induction by low concentration etoposide is dependent on replication but not on transcription.** U2OS cells were pre-treated with aphidicolin (A) or DRB (B) for 30 minutes and then with 10µM etoposide for 2 hours. (EdU was added 15 minutes before etoposide). They were fixed, and stained for RPA, EdU, and CenpF. DNA was stained with Hoechst. (C) Enlarged picture of the nucleus indicated by the arrow in (B). (D) The percentages of RPA foci positive cells under each condition were quantified and plotted.

doi: 10.1371/journal.pone.0079202.g002

high concentrations of etoposide, both replication and transcription can mediate the induction of DSBs.

#### Transcription-dependent but not replication-mediated RPA focus induction is sensitive to proteasome inhibitor MG132

It has been shown that the transcription-dependent mechanism of DSB induction depends on the proteolysis of Top2cc by the 26S proteasome [28,30]. To determine if the replication-dependent mechanism is also dependent on proteolysis, we examined the effect of MG132, a specific inhibitor of the 26S proteasome, on RPA focus formation by etoposide at low and high concentrations. As shown in Figure 5A, at 10µM etoposide, RPA foci still formed in the presence of MG132, albeit with a slight reduction in intensity. The percentage of nuclei with RPA foci was 48% with MG132, compared to 52% without ( $p=0.06$ ) (Figure 5C). At 250µM

etoposide, MG132 did display a modest effect. RPA foci still formed efficiently, but the percentage of RPA foci positive nuclei was reduced from 72% down to 60% ( $p=9.8E-4$ ) (Figure 6A&D). Pre-treatment with both MG132 and DRB was similar to single pre-treatments of either drug, and the percentage of RPA foci positive nuclei was still over 52%, which is not significantly different from 57% for DRB alone ( $p=0.12$ ) and 60% for MG132 alone ( $p=0.024$ ; but not significant at 99% c.i.) (Figure 6B&D). In contrast, when combined with aphidicolin, MG132 caused almost a complete inhibition of RPA focus induction. The percentage of RPA foci positive nuclei was reduced down to 5% ( $p=0$ ) (Figure 6C&D). Together, these results suggest that the 26S proteasome is indeed involved in RPA focus induction, but it acts in the same pathway as the transcription-dependent mechanism and is significant only at high concentrations of etoposide. The replication-dependent

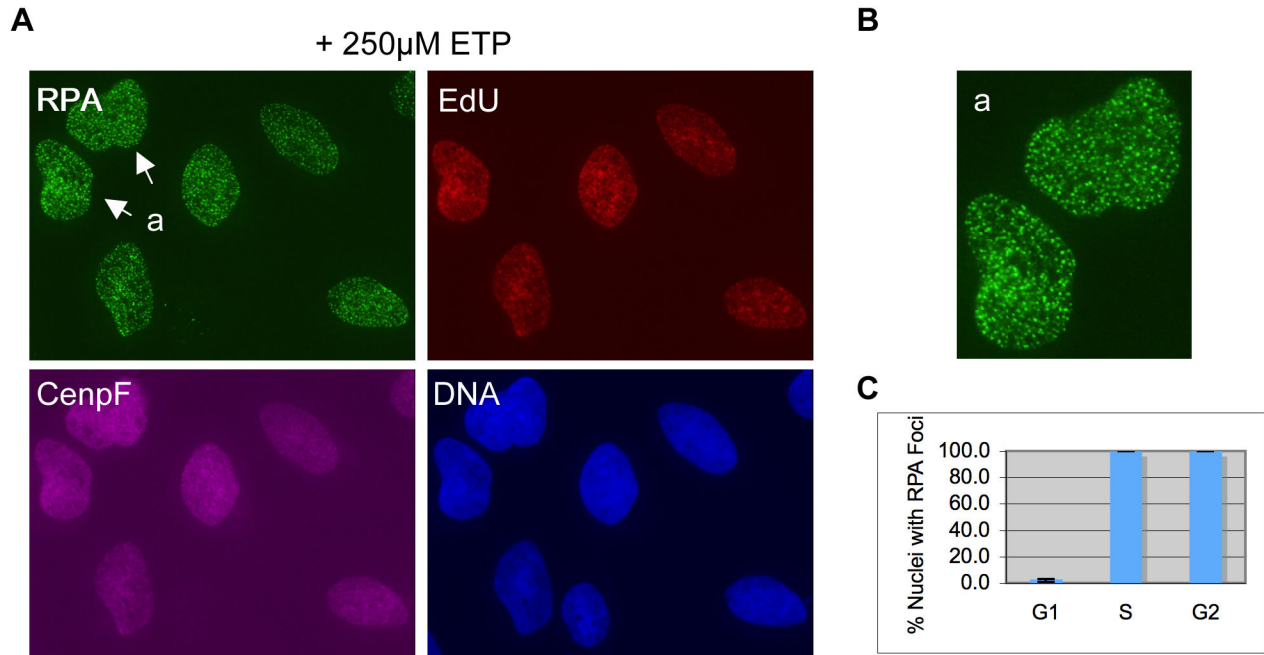

**Figure 3. Etoposide at high concentrations induces RPA foci in S and G2 phase cells.** (A) U2OS cells were pre-treated with EdU for 15 minutes and then with 250µM etoposide for 2 hours. They were fixed and stained for RPA, EdU, and CenpF. DNA was stained with Hoechst. (B) Enlarged picture of the nucleus indicated by the arrow in (A). (C) Percentages of RPA foci positive cells in each cell cycle stage were quantified and plotted.

doi: 10.1371/journal.pone.0079202.g003

mechanism acts in a parallel pathway and does not require the 26S proteasome-mediated degradation of Top2cc.

### Top2α is the major isoform for the replication-dependent pathway while both Top2α and Top2β mediate the transcription-dependent pathway

Mammalian cells contain two isoforms of Top2, Top2α and Top2β, and both are targets of etoposide. The finding that there are two mechanisms for DSB induction raises an important mechanistic question: is a particular isoform responsible for a particular DSB induction mechanism? To address this question, we determined the respective roles of Top2α and Top2β in etoposide-induced RPA focus formation. Briefly, U2OS cells were treated with two rounds of siRNAs against Top2α and Top2β, alone or together, or with control siRNAs for a total of 72 hour. The levels of Top2α and Top2β were reduced to below detection with their respective siRNAs (Figure 7E). Cells were then treated with etoposide at either low or high concentrations and finally fixed for staining for RPA, CenpF and EdU. As expected, knockdown of Top2α had a severe effect on chromosome segregation in many cells, as manifested by the chromosome bridges frequently present between two daughter cells (Figure 7B). Most of the cells were in S or G2 phases, as indicated by the EdU and CenpF stainings. This is consistent with the observation that Top2α's role in DNA replication is not for the synthesis of new strands but for the decatenation of replicating DNA. With 10µM etoposide, where the replication-dependent mechanism is

dominant, Top2α knockdown caused a dramatic reduction in RPA focus formation (Figure 7B). This was in contrast to the control siRNA treatment, where RPA foci were readily formed in S phase cells (Figure 7A). Top2β knockdown had no discernable effect and the double knockdown of Top2α and Top2β was similar to the Top2α single knockdown (Figure 7C&D).

With 250µM etoposide, when both the replication-dependent and the transcription-dependent mechanisms are active, the effect of Top2α knockdown on RPA focus induction was largely attenuated. RPA foci were still formed efficiently in the majority of S and G2 cells (Figure 8A&B). Top2β knockdown again showed no discernable effect, even in G2 cells in which DSBs are induced by the transcription-dependent mechanism (Figure 8C). When Top2α and Top2β were both knocked down, the induction of RPA foci was completely eliminated (Figure 8D). Together, these results showed that RPA focus induction by etoposide is indeed mediated by both isoforms of Top2. Top2α is the major isoform for the replication-dependent DSB induction mechanism, but both Top2α and Top2β contribute to the transcription-dependent mechanism. The overall contribution of Top2α is greater than that of Top2β.

### Discussion

The major findings of this study are: (1) At low concentrations of etoposide, RPA foci are formed in S phase cells (2). At high concentrations of etoposide, RPA foci are

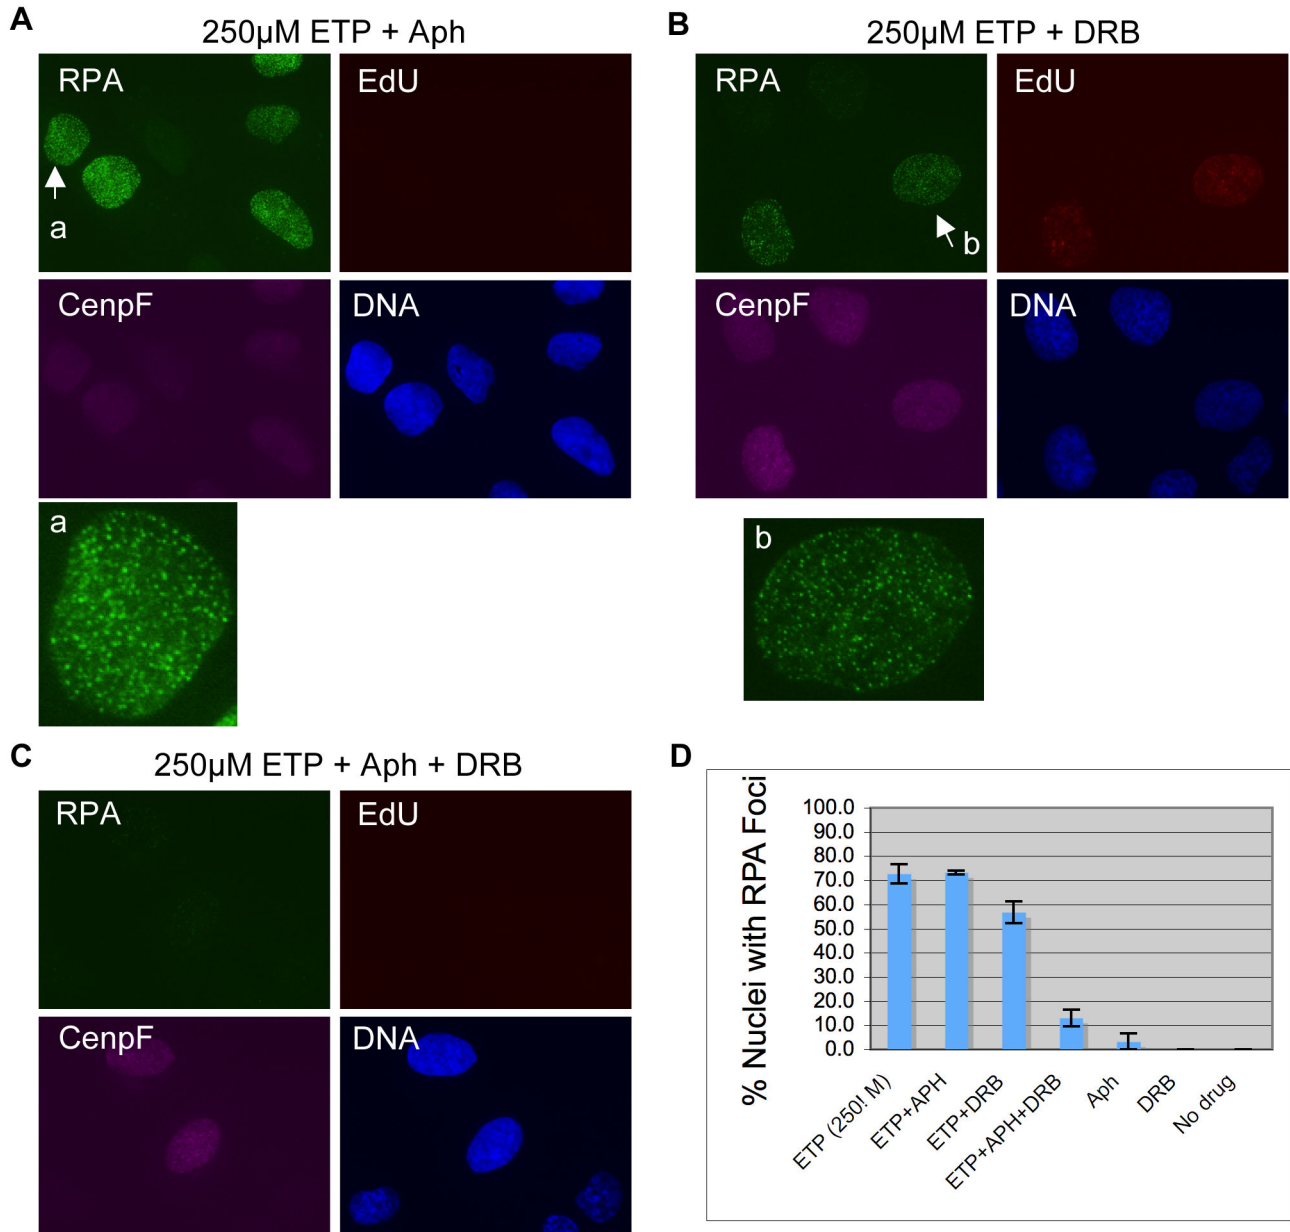

**Figure 4. RPA focus induction by high concentration etoposide is dependent on replication and transcription.** Cells were pre-treated with Aph (**A**), DRB (**B**), or both Aph and DRB (**C**) for 30 minutes and then with 250µM etoposide for 2 hours. (EdU was added 15 minutes before etoposide). They were then fixed, and stained for RPA, EdU, and CenpF. DNA was stained with Hoechst. The nuclei indicated by the arrows are also shown in enlarged format in the center panels. (**D**) The percentages of RPA foci positive cells under each condition were quantified and plotted.

doi: 10.1371/journal.pone.0079202.g004

formed in both S and G2 phase cells (3). At low concentrations of etoposide, RPA foci are induced mostly by a replication-dependent mechanism (4). At high concentrations of etoposide, RPA foci are induced by a replication-dependent mechanism and a transcription-dependent mechanism (5). The transcription-dependent mechanism requires proteolysis, but the replication-dependent mechanism does not (6). Top2α is

the major isoform mediating DSB induction by etoposide and participates in both the replication-dependent mechanism and the transcription-dependent mechanism (7). Top2β mediates the transcription-dependent mechanism.

What might these findings reveal about the mechanism of DSB induction by etoposide? Two key observations established by previous studies have to be considered. Firstly,

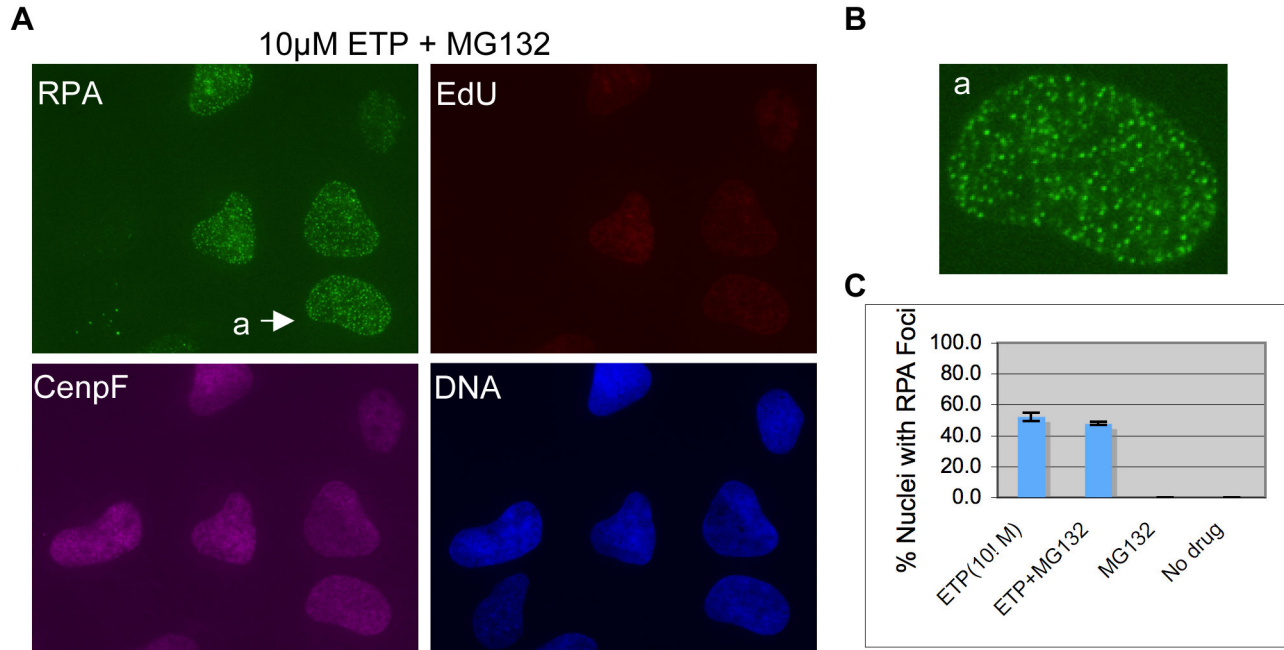

**Figure 5. RPA focus induction by the replication-dependent mechanism does not require the 26S proteasome-mediated degradation of Top2cc.** (A) MG132 was added 30 minutes before etoposide (and 15 minutes before EdU). Cells were fixed and stained for RPA, EdU, and CenpF. DNA was stained with Hoechst. (B) Enlarged picture of the nucleus as indicated by the arrow in (A). (C) Percentages of RPA foci positive cells under each condition were quantified and plotted.

doi: 10.1371/journal.pone.0079202.g005

none of the inhibitors, aphidicolin, DRB, or MG132, affect the formation of Top2ccs per se [41], so their effects on DSB induction are on the downstream cellular processing events. Secondly, etoposide acts as a two-drug, i.e., it binds independently to each of the Top2 subunits. Each drug molecule inhibits only the re-ligation reaction of the subunit it binds to, thus the resulting Top2cc can be either single-stranded (ss-Top2cc) or double-stranded (ds-Top2cc) depending on the concentration of etoposide [42]. In light of these observations, the findings of this study thus support the following model for the induction of DSBs by etoposide in cells (Figure 9). The  $K_i$  of etoposide for Top2 is as high as 20µM [2]. At low concentrations of etoposide, the majority of DNA breaks are single-stranded [43,44]. Upon collision with the replication machinery, single-stranded Top2ccs (ss-Top2ccs) are converted into DSBs. How this conversion actually occurs is currently unknown. One potential mechanism is that the conformation of Top2ccs might be distorted upon collision with replication fork complexes, resulting in the release of the 3' end to form DSBs (replication run-off). Alternatively, Top2ccs might lead to the stall and collapse of replication forks, which are then processed into DSBs by structure-specific nucleases such as Mus81 [45]. Neither of these two mechanisms requires Top2cc degradation. Collision with the transcription machinery can stimulate the degradation of ss-Top2ccs, but this would reveal single-strand breaks rather than DSBs. At high concentrations of etoposide, both subunits of Top2 are bound by etoposide and both strands of DNA are nicked and covalently linked to

Top2 to form ds-Top2ccs. Ds-Top2ccs can still be converted into DSBs upon collision with the replication machinery, but they can now also be converted into DSBs by degradation mediated by the 26S proteasome. Collision with the transcription machinery strongly stimulates Top2cc degradation. As such, DSB induction at high concentrations of etoposide can be inhibited only if both replication and transcription are blocked. Top2 $\alpha$  participates in DNA replication and its expression is up-regulated in S and G2 cells. It's therefore the major mediator of the replication-dependent DSB induction mechanism. Top2 $\beta$  participates in transcription and can therefore mediate the transcription-dependent mechanism. However, Top2 $\alpha$  can also mediate the transcription-dependent mechanism, making it the major isoform mediating DSB induction by etoposide.

This model is supported by many findings reported in literature. It has been observed that the cytotoxicity of Top2-targeting drugs such as m-AMSA and etoposide can be partially suppressed by aphidicolin, but only at low drug concentrations [34,35]. This is consistent with our finding that the replication-dependent mechanism is more important at low concentrations than at high concentrations of etoposide. It has also been reported that both transcription and replication participate in the activation of cell cycle checkpoints in response to etoposide, but of different types [41]. This is consistent with our finding that both replication and transcription can convert Top2ccs to DSBs but by different mechanisms and thus likely yield different end structures that



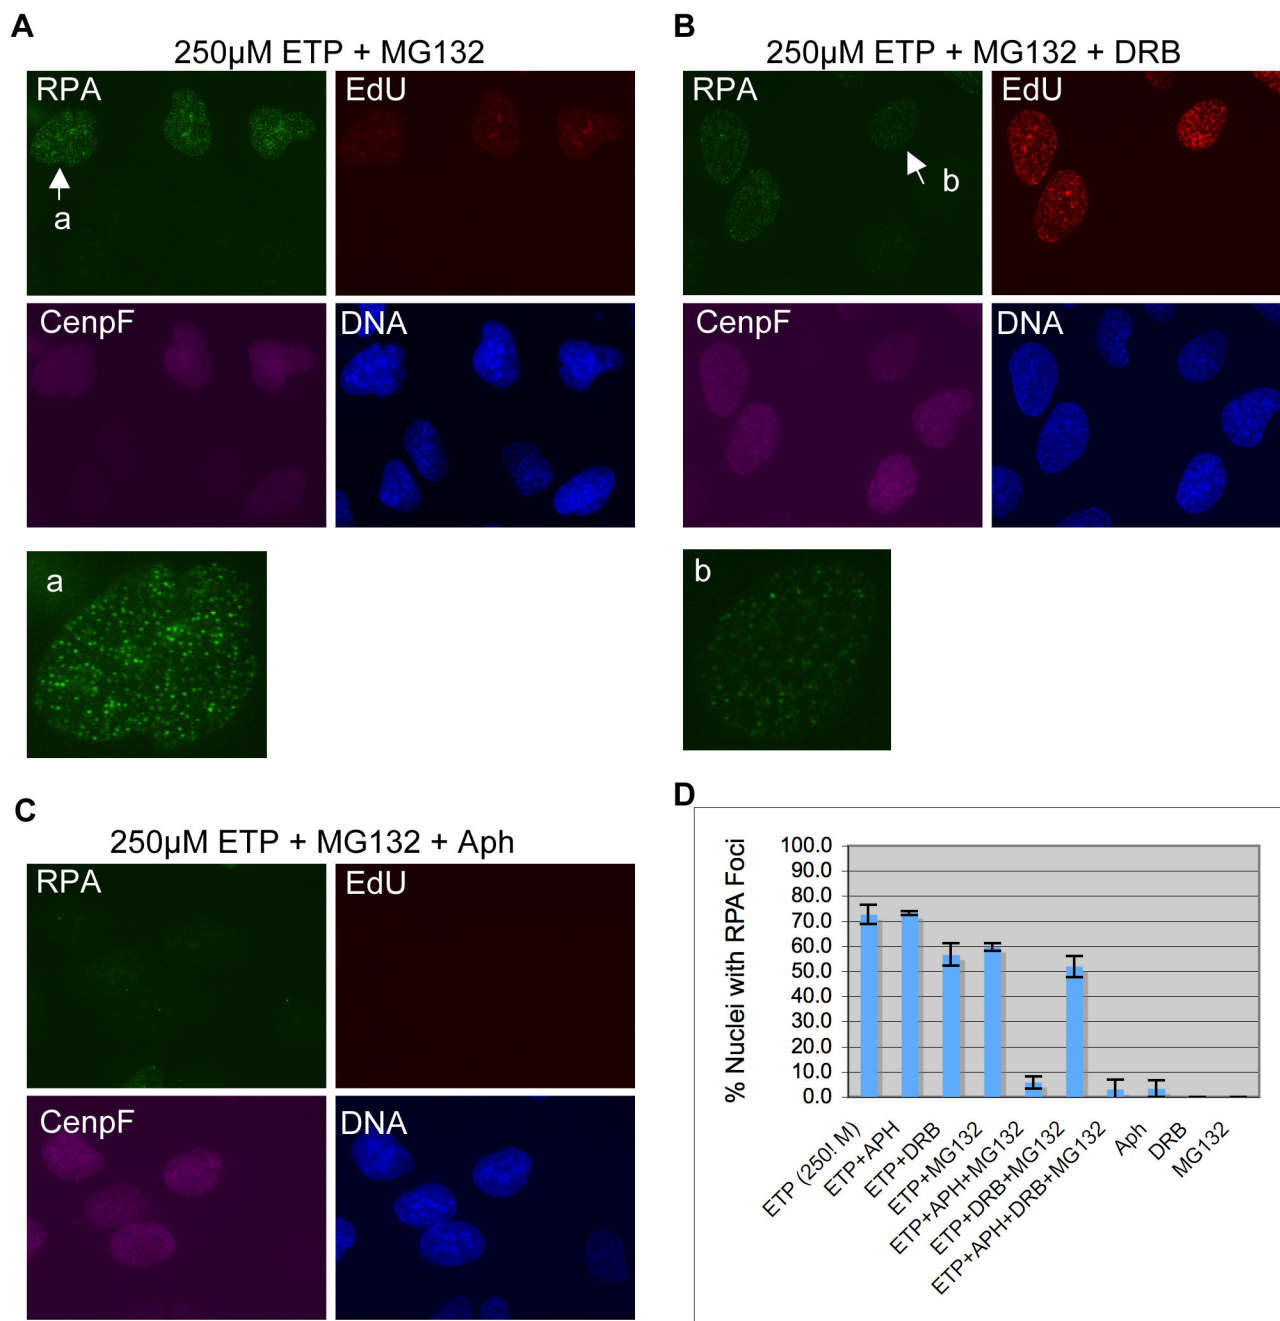

**Figure 6. RPA focus induction by the transcription-dependent mechanism is dependent on the 26S proteasome-mediated degradation of Top2cc.** Cells were pre-treated with MG132 (A), MG132 and Aph (B) or MG132 and DRB (C). They were then treated with 250µM etoposide for 2 hours, fixed, and stained for RPA, EdU, and CenpF. DNA was stained with Hoechst. The nuclei indicated by arrows are also shown in enlarged format in the center panels. (D) Percentages of RPA foci positive cells under each condition were quantified and plotted.

doi: 10.1371/journal.pone.0079202.g006

are sensed by different checkpoint proteins. Finally, it has been repeatedly shown that Top2α is the primary isoform mediating the cytotoxicity of etoposide [28,32]. This is easily explained by our finding that Top2α participates in both the replication-

dependent and the transcription-dependent DSB induction. At low concentrations of etoposide, the replication-dependent mechanism, which is exclusively mediated by Top2α, is dominant. Also, Top2α expression is up-regulated in S phase

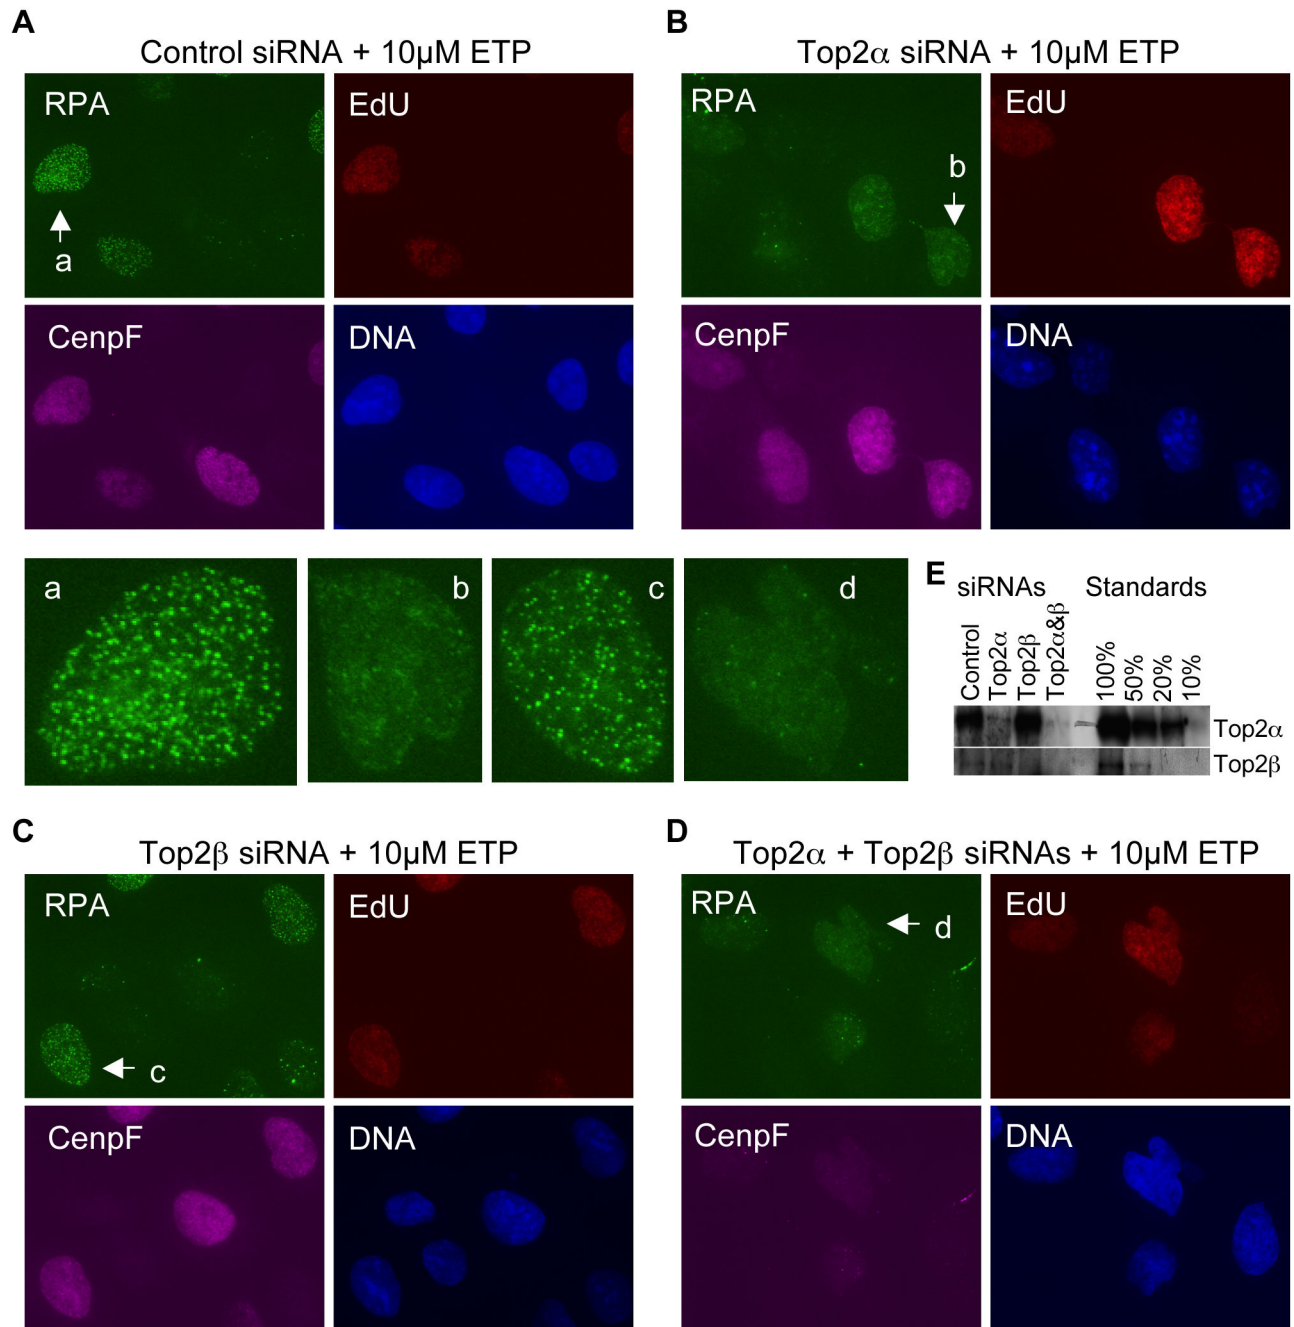

**Figure 7. Top2 $\alpha$  is the major isoform mediating the replication-dependent DSB induction mechanism.** Cells were treated with two rounds of control siRNAs or Top2 $\alpha$  and Top2 $\beta$  siRNAs for 72 hours. They were then treated with 10 $\mu$ M etoposide for 2 hours, fixed, and stained for RPA, EdU, and CenpF. DNA was stained with Hoechst. (A)-(D): siRNA treated cells stained for RPA, EdU, CenpF, and DNA. The nuclei indicated by arrows are also shown in enlarged format in the center panels. (E). Western blot analysis of Top2 $\alpha$  and Top2 $\beta$  levels in siRNA treated cells. Different amounts of U2OS cell lysates were used as quantification standards.

doi: 10.1371/journal.pone.0079202.g007

and G2 phase cells, further accentuating the importance of Top2 $\alpha$  in mediating etoposide's cytotoxicity in proliferative cells. Clearly, the exact contribution of each isoform is also affected

by the efficiency of their degradation, which varies in different types of cells [41]. In particular, Top2 $\beta$  is expected to be the

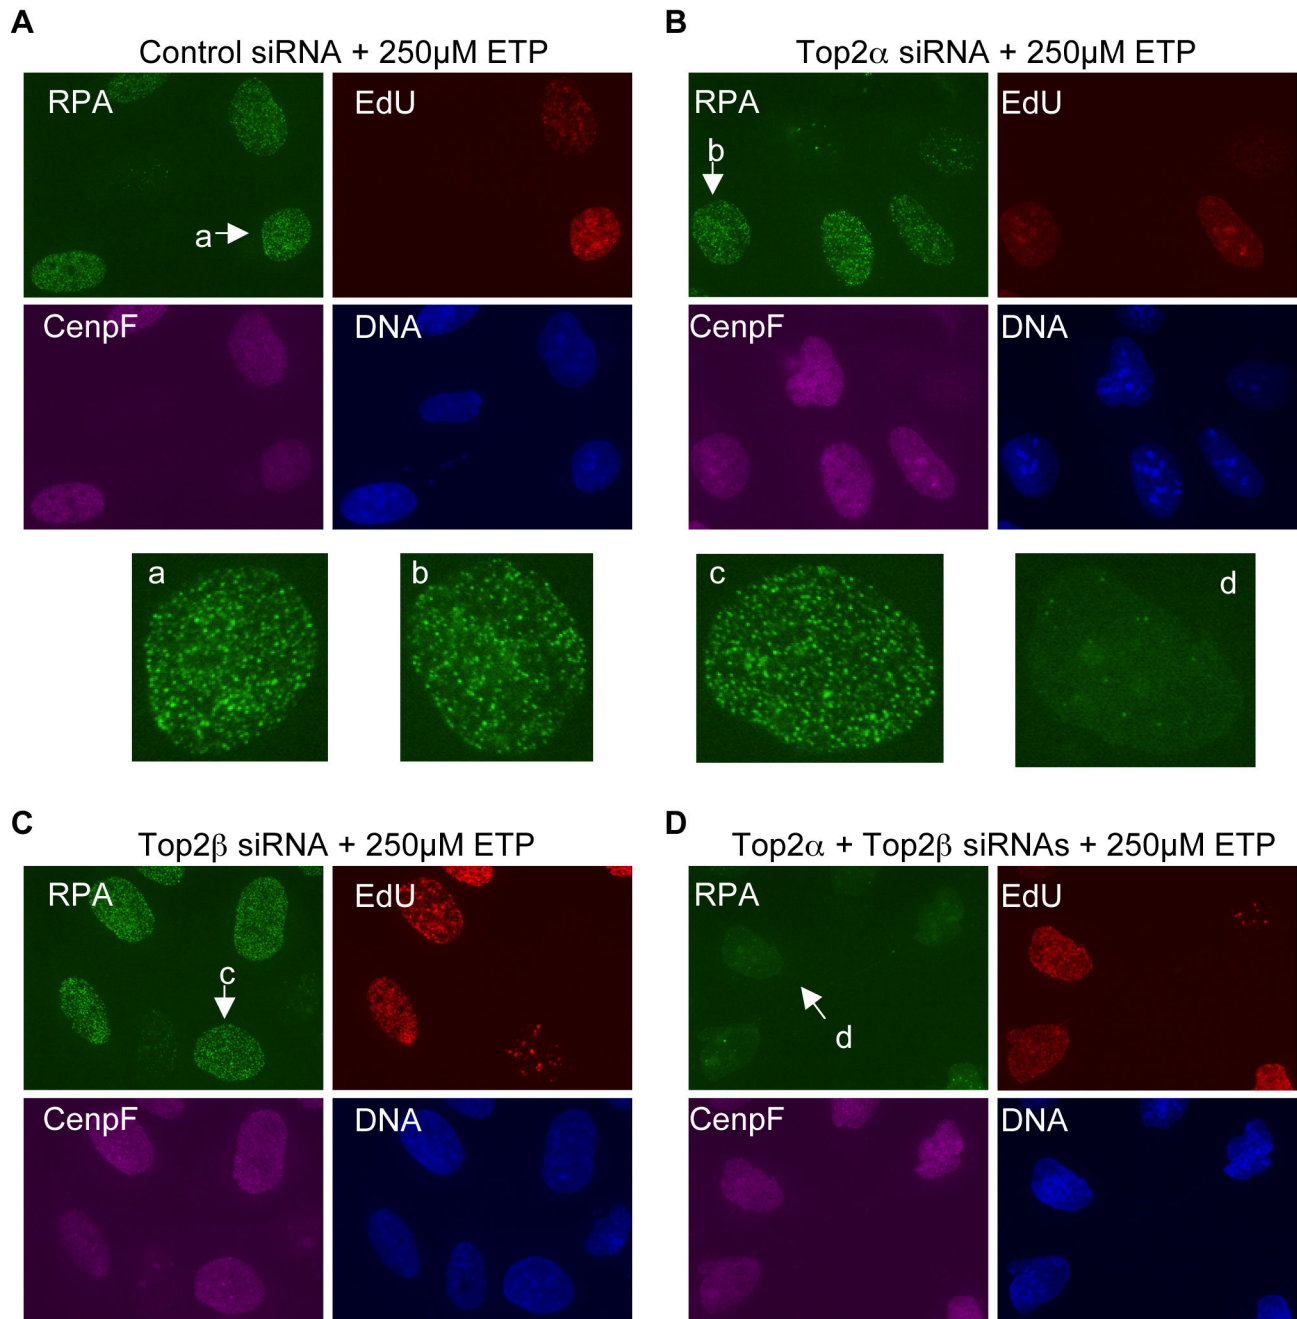

**Figure 8. Top2 $\alpha$  and Top2 $\beta$  can both mediate the transcription-dependent DSB induction mechanism.** Cells were treated with two rounds of control siRNAs or Top2 $\alpha$  and Top2 $\beta$  siRNAs for 72 hours. They were then treated with 250μM etoposide for 2 hours, fixed, and stained for RPA, EdU, and CenpF. DNA was stained with Hoechst. The nuclei indicated by arrows are also shown in enlarged format in the center panels.

doi: 10.1371/journal.pone.0079202.g008

major isoform mediating etoposide's effect in non-proliferative cells.

The critical role of replication in DSB induction by etoposide as demonstrated in this study makes it a little surprising that it has not been previously discovered. Replication fork collision is

known to convert the single-stranded 3' phosphotyrosine-DNA topoisomerase 1 cleavage complex (Top1cc) that can be trapped by drugs like camptothecin, into DSBs [46]. There is no *a priori* reason against replication forks acting in a similar way to convert Top2ccs into DSBs. The most likely explanation is

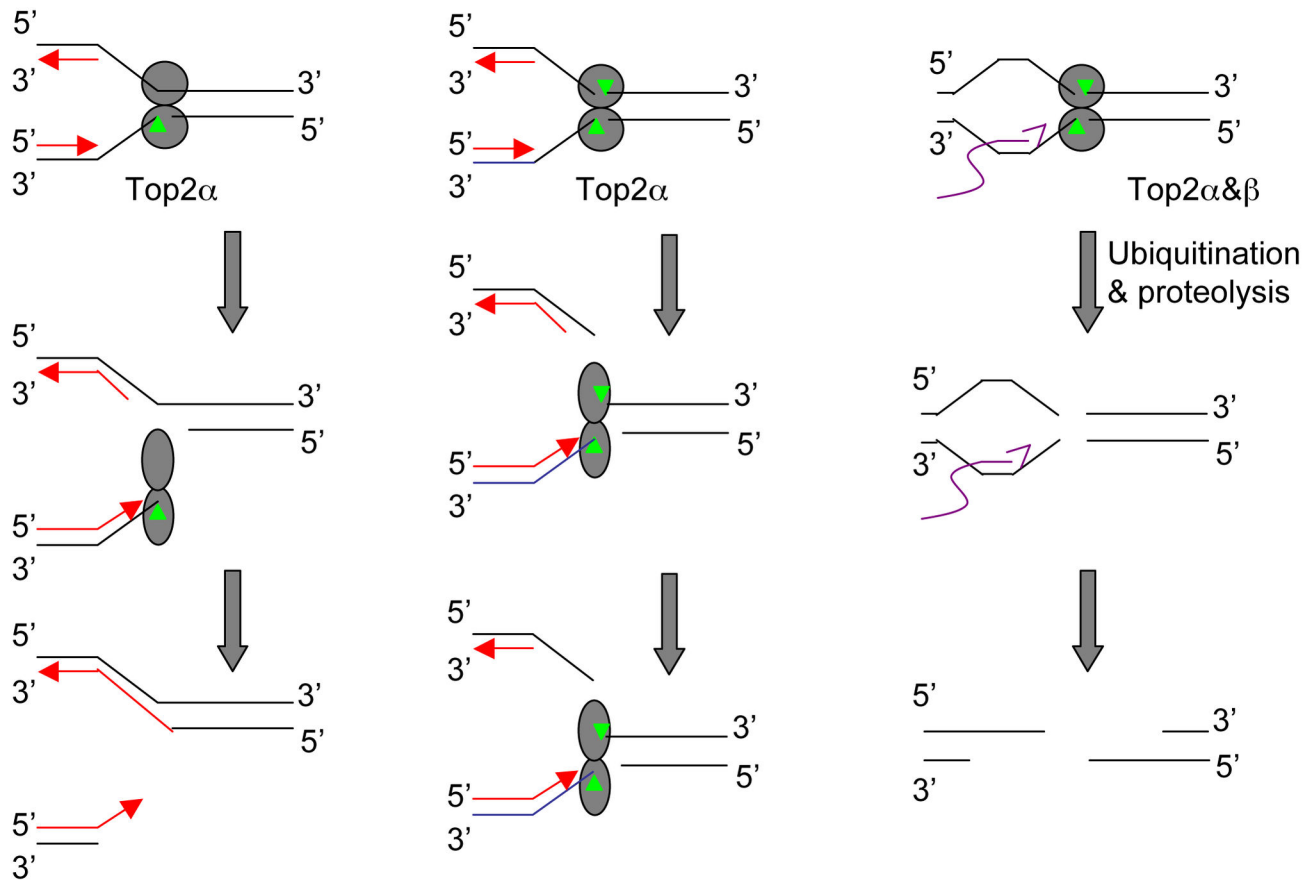

**Figure 9. Model for DSB Induction by Etoposide in Cells.** At low concentrations of etoposide, one subunit of Top2 is occupied by the drug to form a ss-Top2cc. Upon collision with the replication fork, ss-Top2cc is converted into a DSB, either directly by replication run-off (depicted) or indirectly by nucleolytic processing of collapsed replication forks (not depicted). At high concentrations of etoposide, both subunits of Top2 are occupied by the drug, resulting in a ds-Top2cc. It can be converted into a DSB by collision with the replication machinery or by degradation, which is stimulated by collision with the transcription machinery. Degradation might also occur independently of transcription.

doi: 10.1371/journal.pone.0079202.g009

the difference in assays to detect DSBs used in our study and previous studies. DSBs are commonly detected by the neutral COMET assay or neutral CFGE (constant field gel electrophoresis) assay [28,30,44], both of which are based on the principle that broken genomic DNA strands in cells embedded in agarose have a faster mobility than intact genomic DNA during electrophoresis. The sensitivity of such assays is determined by the number of DSBs and the structure of DNA. If there are insufficient numbers of DSBs, the genomic DNA would still be too large to migrate into agarose. Furthermore, replicating DNA molecules usually carry branches or bubbles, structures known to dramatically slow down electrophoresis mobility [47,48]. In the COMET assays of such studies, very high concentrations of etoposide (250 $\mu$ M) were used, which are expected to generate a large number of DSBs by both transcription-dependent and replication-dependent mechanisms. DNA fragments generated by the replication-dependent DSBs are likely to carry branches or bubbles, the tail detected in the COMET assay thus represents mostly DSBs

derived from the transcription-dependent mechanism. In our study, DSBs are detected by immunofluorescence staining of RPA foci, which represent 3' ss-DNA derived from the resection of 5' strands. Each DSB is expected to generate a RPA focus, making the assay extremely sensitive. It is unaffected by abnormal mobilities of structures like branches or bubbles, avoiding the complication of DNA replication intermediates as in the COMET assay. Importantly, in agreement with the COMET assay, it also revealed an important role for the transcription-stimulated degradation of Top2 in DSB induction by etoposide. This in turn provides strong validation for the RPA focus assay for the detection of DSBs.

A limitation of this assay is that resection is activated in S and G2 cells and occurs only at DSBs channeled to HR but not those to NHEJ. However, the choice between NHEJ and HR is made after a DSB is formed. As such, in S and G2 cells, RPA staining reveals the formation of all DSBs rather than just those channeled to HR. In G1 cells, resection activity is low and

NHEJ is the dominant DSB repair pathway. Previous studies using the COMET assay have shown that DSB induction by etoposide occurs in all stages of the cell cycle including G1 [32] and can be inhibited by DRB and MG132 [28,30]. In our studies, the basal level RPA foci induced by high concentrations of etoposide in G1 cells are further reduced by DRB and MG132. Taken together, it is reasonable to conclude that G1 cells use the transcription-stimulated proteolysis of Top2ccs to generate DSBs.

The findings of this study have strong implications for the optimal use of etoposide in cancer therapy. Current therapeutic regimens achieve plasma levels ranging from 10 $\mu$ M to 130 $\mu$ M [49]. Our finding that low concentration etoposide induces DSBs by a replication-dependent mechanism while high concentration etoposide does so by both replication-dependent and transcription-dependent mechanisms has important implications for the optimization of etoposide regimens. Continuous or frequent administration of low dose should have better efficacy by preferentially killing tumor cells, which contain high fractions of S phase cells, without inflicting significant damage to normal tissues such as heart, which are composed mostly of non-replicating cells. In contrast, a few large doses of etoposide might inflict too much damage to normal tissues

without the extra benefit of more efficient killing of highly proliferative tumor cells. In addition, since Top2 $\beta$  appears to be the major isoform mediating etoposide-induced chromosomal translocations [30,50], lower drug doses, which are ineffective at converting Top2 $\beta$ ccs to DSBs, might reduce the risk of secondary malignancies. Another implication of this study is that the end structures of the DSBs generated by the two mechanisms might be different. In the case of the transcription-dependent mechanism, the resulting ends are expected to carry a short peptide or 5' phosphotyrosine. In the case of the replication-dependent mechanism, the resulting ends are likely to be either naked or carry a protein adduct. Further studies are required to understand how these different types of ends are repaired. Inhibiting specifically the DSBs generated by the replication-dependent mechanism might provide further improvement to the efficacy while reducing the side effects of etoposide in cancer therapy.

### Author Contributions

Conceived and designed the experiments: MT PB BR HY. Performed the experiments: MT PB BR HY. Analyzed the data: MT PB BR HY. Wrote the manuscript: HY.

### References

- Hande KR (1998) Etoposide: four decades of development of a topoisomerase II inhibitor. *Eur J Cancer* 34: 1514-1521. doi:10.1016/S0959-8049(98)00228-7. PubMed: 9893622.
- Nitiss JL (2009) Targeting DNA topoisomerase II in cancer chemotherapy. *Nat Rev Cancer* 9: 338-350. doi:10.1038/nrc2607. PubMed: 19377506.
- Pommier Y, Coldwasser F (2011) Topoisomerase II inhibitors: The Epipodophyllotoxins. In: BA ChabnerDL Longo. *Cancer Chemotherapy and Biotherapy*. Philadelphia: Lippincott Raven. pp. 392-410.
- Pommier Y (2013) Drugging topoisomerases: lessons and challenges. *ACS Chem Biol* 8: 82-95. doi:10.1021/cb300648v. PubMed: 23259582.
- Felix CA (1998) Secondary leukemias induced by topoisomerase-targeted drugs. *Biochim Biophys Acta* 1400: 233-255. doi:10.1016/S0167-4781(98)00139-0. PubMed: 9748598.
- Smith MA, Rubinstein L, Anderson JR, Arthur D, Catalano PJ et al. (1999) Secondary leukemia or myelodysplastic syndrome after treatment with epipodophyllotoxins. *J Clin Oncol* 17: 569-577. PubMed: 10080601.
- Aplan PD (2006) Chromosomal translocations involving the MLL gene: molecular mechanisms. *DNA Repair (Amst)* 5: 1265-1272. doi:10.1016/j.dnarep.2006.05.034. PubMed: 16797254.
- Sung PA, Libura J, Richardson C (2006) Etoposide and illegitimate DNA double-strand break repair in the generation of MLL translocations: new insights and new questions. *DNA Repair (Amst)* 5: 1109-1118. doi:10.1016/j.dnarep.2006.05.018. PubMed: 16809075.
- Tsai-Pflugfelder M, Liu LF, Liu AA, Tewey KM, Whang-Peng J et al. (1988) Cloning and sequencing of cDNA encoding human DNA topoisomerase II and localization of the gene to chromosome region 17q21-22. *Proc Natl Acad Sci U S A* 85: 7177-7181. doi:10.1073/pnas.85.19.7177. PubMed: 2845399.
- Jenkins JR, Ayton P, Jones T, Davies SL, Simmons DL et al. (1992) Isolation of cDNA clones encoding the beta isozyme of human DNA topoisomerase II and localization of the gene to chromosome 3p24. *Nucleic Acids Res* 20: 5587-5592. doi:10.1093/nar/20.21.5587. PubMed: 1333583.
- Tan KB, Dorman TE, Falls KM, Chung TD, Mirabelli CK et al. (1992) Topoisomerase II alpha and topoisomerase II beta genes: characterization and mapping to human chromosomes 17 and 3, respectively. *Cancer Res* 52: 231-234. PubMed: 1309226.
- Austin CA, Sng JH, Patel S, Fisher LM (1993) Novel HeLa topoisomerase II is the II beta isoform: complete coding sequence and homology with other type II topoisomerases. *Biochim Biophys Acta* 1172: 283-291. doi:10.1016/0167-4781(93)90215-Y. PubMed: 8383537.
- Heck MM, Earnshaw WC (1986) Topoisomerase II: A specific marker for cell proliferation. *J Cell Biol* 103: 2569-2581. doi:10.1083/jcb.103.6.2569. PubMed: 3025219.
- Hsiang YH, Wu HY, Liu LF (1988) Proliferation-dependent regulation of DNA topoisomerase II in cultured human cells. *Cancer Res* 48: 3230-3235. PubMed: 2835157.
- Goswami PC, Roti Roti JL, Hunt CR (1996) The cell cycle-coupled expression of topoisomerase IIalpha during S phase is regulated by mRNA stability and is disrupted by heat shock or ionizing radiation. *Mol Cell Biol* 16: 1500-1508. PubMed: 8657123.
- Wang JC (2002) Cellular roles of DNA topoisomerases: a molecular perspective. *Nat Rev Mol Cell Biol* 3: 430-440. doi:10.1038/nrm831. PubMed: 12042765.
- Woessner RD, Mattern MR, Mirabelli CK, Johnson RK, Drake FH (1991) Proliferation- and cell cycle-dependent differences in expression of the 170 kilodalton and 180 kilodalton forms of topoisomerase II in NIH-3T3 cells. *Cell Growth Differ* 2: 209-214. PubMed: 1651102.
- Grue P, Grässer A, Sehested M, Jensen PB, Uhse A et al. (1998) Essential mitotic functions of DNA topoisomerase IIalpha are not adopted by topoisomerase IIbeta in human H69 cells. *J Biol Chem* 273: 33660-33666. doi:10.1074/jbc.273.50.33660. PubMed: 9837951.
- Yang X, Li W, Prescott ED, Burden SJ, Wang JC (2000) DNA topoisomerase IIbeta and neural development. *Science* 287: 131-134. doi:10.1126/science.287.5450.131. PubMed: 10615047.
- Ju BG, Lunyak VV, Perissi V, Garcia-Bassets I, Rose DW et al. (2006) A topoisomerase IIbeta-mediated dsDNA break required for regulated transcription. *Science* 312: 1798-1802. doi:10.1126/science.1127196. PubMed: 16794079.
- Cornarotti M, Tinelli S, Willmore E, Zunino F, Fisher LM et al. (1996) Drug sensitivity and sequence specificity of human recombinant DNA topoisomerases IIalpha (p170) and IIbeta (p180). *Mol Pharmacol* 50: 1463-1471. PubMed: 8967966.
- Willmore E, Frank AJ, Padgett K, Tilby MJ, Austin CA (1998) Etoposide targets topoisomerase IIalpha and IIbeta in leukemic cells: isoform-specific cleavable complexes visualized and quantified in situ by a novel immunofluorescence technique. *Mol Pharmacol* 54: 78-85. PubMed: 9658192.
- Deweese JE, Osheroff N (2009) The DNA cleavage reaction of topoisomerase II: wolf in sheep's clothing. *Nucleic Acids Res* 37: 738-748. doi:10.1093/nar/gkn758. PubMed: 19042970.
- Chen GL, Yang L, Rowe TC, Halligan BD, Tewey KM et al. (1984) Nonintercalative antitumor drugs interfere with the breakage-reunion reaction of mammalian DNA topoisomerase II. *J Biol Chem* 259: 13560-13566. PubMed: 6092381.

25. Tennyson RB, Lindsley JE (1997) Type II DNA topoisomerase from *Saccharomyces cerevisiae* is a stable dimer. *Biochemistry* 36: 6107-6114. doi:10.1021/bi970152f. PubMed: 9166781.
26. Mao Y, Desai SD, Ting CY, Hwang J, Liu LF (2001) 26 S proteasome-mediated degradation of topoisomerase II cleavable complexes. *J Biol Chem* 276: 40652-40658. doi:10.1074/jbc.M104009200. PubMed: 11546768.
27. Xiao H, Mao Y, Desai SD, Zhou N, Ting CY et al. (2003) The topoisomerase IIbeta circular clamp arrests transcription and signals a 26S proteasome pathway. *Proc Natl Acad Sci U S A* 100: 3239-3244. doi:10.1073/pnas.0736401100. PubMed: 12629207.
28. Zhang A, Lyu YL, Lin CP, Zhou N, Azarova AM et al. (2006) A protease pathway for the repair of topoisomerase II-DNA covalent complexes. *J Biol Chem* 281: 35997-36003. doi:10.1074/jbc.M604149200. PubMed: 16973621.
29. Alchanati I, Teicher C, Cohen G, Shemesh V, Barr HM et al. (2009) The E3 ubiquitin-ligase Bmi1/Ring1A controls the proteasomal degradation of Top2alpha cleavage complex - a potentially new drug target. *PLOS ONE* 4: e8104. doi:10.1371/journal.pone.0008104. PubMed: 19956605.
30. Azarova AM, Lyu YL, Lin CP, Tsai YC, Lau JY et al. (2007) Roles of DNA topoisomerase II isozymes in chemotherapy and secondary malignancies. *Proc Natl Acad Sci U S A* 104: 11014-11019. doi:10.1073/pnas.0704002104. PubMed: 17578914.
31. Lyu YL, Kerrigan JE, Lin CP, Azarova AM, Tsai YC et al. (2007) Topoisomerase IIbeta mediated DNA double-strand breaks: implications in doxorubicin cardiotoxicity and prevention by dexrazoxane. *Cancer Res* 67: 8839-8846. doi:10.1158/0008-5472.CAN-07-1649. PubMed: 17875725.
32. de Campos-Nebel M, Larripa I, González-Cid M (2010) Topoisomerase II-mediated DNA damage is differently repaired during the cell cycle by non-homologous end joining and homologous recombination. *PLOS ONE* 5: e12541. doi:10.1371/journal.pone.0012541. PubMed: 20824055.
33. Burgess DJ, Doles J, Zender L, Xue W, Ma B et al. (2008) Topoisomerase levels determine chemotherapy response in vitro and in vivo. *Proc Natl Acad Sci U S A* 105: 9053-9058. doi:10.1073/pnas.0803513105. PubMed: 18574145.
34. Holm C, Covey JM, Kerrigan D, Pommier Y (1989) Differential requirement of DNA replication for the cytotoxicity of DNA topoisomerase I and II inhibitors in Chinese hamster DC3F cells. *Cancer Res* 49: 6365-6368. PubMed: 2553254.
35. D'Arpa P, Beardmore C, Liu LF (1990) Involvement of nucleic acid synthesis in cell killing mechanisms of topoisomerase poisons. *Cancer Res* 50: 6919-6924. PubMed: 1698546.
36. Robison JG, Lu L, Dixon K, Bissler JJ (2005) DNA lesion-specific colocalization of the Mre11/Rad50/Nbs1 (MRN) complex and replication protein A (RPA) to repair foci. *J Biol Chem* 280: 12927-12934. PubMed: 15653682.
37. Symington LS, Gautier J (2011) Double-Strand Break End Resection and Repair Pathway Choice. *Annu Rev Genet* 45: 247-271. doi:10.1146/annurev-genet-110410-132435. PubMed: 21910633.
38. Huertas P, Jackson SP (2009) Human CtIP mediates cell cycle control of DNA end resection and double strand break repair. *J Biol Chem* 284: 9558-9565. doi:10.1074/jbc.M808906200. PubMed: 19202191.
39. Kao GD, McKenna WG, Yen TJ (2001) Detection of repair activity during the DNA damage-induced G2 delay in human cancer cells. *Oncogene* 20: 3486-3496. doi:10.1038/sj.onc.1204445. PubMed: 11429695.
40. Kornberg A, Baker TA (1992) DNA Replication. New York: Freeman and Company.
41. Fan JR, Peng AL, Chen HC, Lo SC, Huang TH et al. (2008) Cellular processing pathways contribute to the activation of etoposide-induced DNA damage responses. *DNA Repair (Amst)* 7: 452-463. doi:10.1016/j.dnarep.2007.12.002. PubMed: 18206427.
42. Bromberg KD, Burgin AB, Osheroff N (2003) A two-drug model for etoposide action against human topoisomerase IIalpha. *J Biol Chem* 278: 7406-7412. doi:10.1074/jbc.M212056200. PubMed: 12473657.
43. Long BH, Musial ST, Brattain MG (1985) Single- and double-strand DNA breakage and repair in human lung adenocarcinoma cells exposed to etoposide and teniposide. *Cancer Res* 45: 3106-3112. PubMed: 3839166.
44. Muslimović A, Nyström S, Gao Y, Hammarsten O (2009) Numerical analysis of etoposide induced DNA breaks. *PLOS ONE* 4: e5859. doi:10.1371/journal.pone.0005859. PubMed: 19516899.
45. Hanada K, Budzowska M, Davies SL, van Drunen E, Onizawa H et al. (2007) The structure-specific endonuclease Mus81 contributes to replication restart by generating double-strand DNA breaks. *Nat Struct Mol Biol* 14: 1096-1104. doi:10.1038/nsmb1313. PubMed: 17934473.
46. Strumberg D, Pilon AA, Smith M, Hickey R, Malkas L et al. (2000) Conversion of topoisomerase I cleavage complexes on the leading strand of ribosomal DNA into 5'-phosphorylated DNA double-strand breaks by replication runoff. *Mol Cell Biol* 20: 3977-3987. doi:10.1128/MCB.20.11.3977-3987.2000. PubMed: 10805740.
47. Brewer BJ, Fangman WL (1987) The localization of replication origins on ARS plasmids in *S. cerevisiae*. *Cell* 51: 463-471. doi:10.1016/0092-8674(87)90642-8. PubMed: 2822257.
48. Olive PL, Banáth JP (1993) Detection of DNA double-strand breaks through the cell cycle after exposure to X-rays, bleomycin, etoposide and 125I-Urd. *Int J Radiat Biol* 64: 349-358. doi:10.1080/09553009314551531. PubMed: 7693837.
49. Schonh I, Hennesen J, Dartsch DC (2010) Cellular responses to etoposide: cell death despite cell cycle arrest and repair of DNA damage. *Apoptosis* 15: 162-172. doi:10.1007/s10495-009-0440-9. PubMed: 20041303.
50. Cowell IG, Sondka Z, Smith K, Lee KC, Manville CM et al. (2012) Model for MLL translocations in therapy-related leukemia involving topoisomerase IIbeta-mediated DNA strand breaks and gene proximity. *Proc Natl Acad Sci U S A* 109: 8989-8994. doi:10.1073/pnas.1204406109. PubMed: 22615413.
